# Supplementary material for: Next generation sequencing based identification of disease-associated mutations in Swiss patients with retinal dystrophies
Source: PubMed Central journal article supplement (PMC4926080; doi:10.1038/srep28755), 2016-06-29
Supplement: srep28755-s1.pdf [file srep28755-s1.pdf]

Next generation sequencing based identification of disease-associated mutations in Swiss patients with retinal dystrophies

Amit Tiwari<sup>1</sup>, Angela Bahr<sup>1</sup>, Luzy Baehr<sup>1</sup>, Johannes Fleischhauer<sup>3#</sup>, Martin Zinkernagel<sup>2</sup>, Niklas Winkler<sup>3</sup>, Daniel Barthelmes<sup>3</sup>, Lieselotte Berger<sup>2</sup>,  
Christina Gerth-Kahlert<sup>3</sup>, John Neidhardt<sup>1+</sup>, Wolfgang Berger<sup>1,4,5\*</sup>

Affiliations:

1. Institute of Medical Molecular Genetics, University of Zürich, Wagistrasse 12, CH-8952, Schlieren, Switzerland;
2. Department of Ophthalmology, University Hospital Bern, Bern, Switzerland;
3. Department of Ophthalmology, University Hospital Zürich and University of Zürich, Zürich, Switzerland;
4. Zurich Center for Integrative Human Physiology (ZIHP), University of Zürich, Zürich, Switzerland;
5. Neuroscience Center Zurich (ZNZ), University and ETH Zürich, Zürich, Switzerland

+Address since July 1<sup>st</sup> 2014: Human Genetics, Faculty of Medicine and Health Sciences, University of Oldenburg, 26129 Oldenburg, Germany;  
Research Center Neurosensory Science, University Oldenburg, 26111 Oldenburg, Germany

# Current address: Talacker Augen Zentrum Zürich, Talacker 42, CH-8001 Zürich, Switzerland

\*Correspondence to:

Prof. Dr. Wolfgang Berger, Institute of Medical Molecular Genetics, University of Zurich, Wagistrasse 12, CH-8952, Schlieren, Switzerland. Phone:  
+41 44 556 33 50, Fax: +41 44 556 33 51, Email: [berger@medmolgen.uzh.ch](mailto:berger@medmolgen.uzh.ch)

Supplementary Figure 1: Comparison of types and numbers of variants obtained upon WES by Illumina NextSeq500 Vs Illumina HiSeq2000

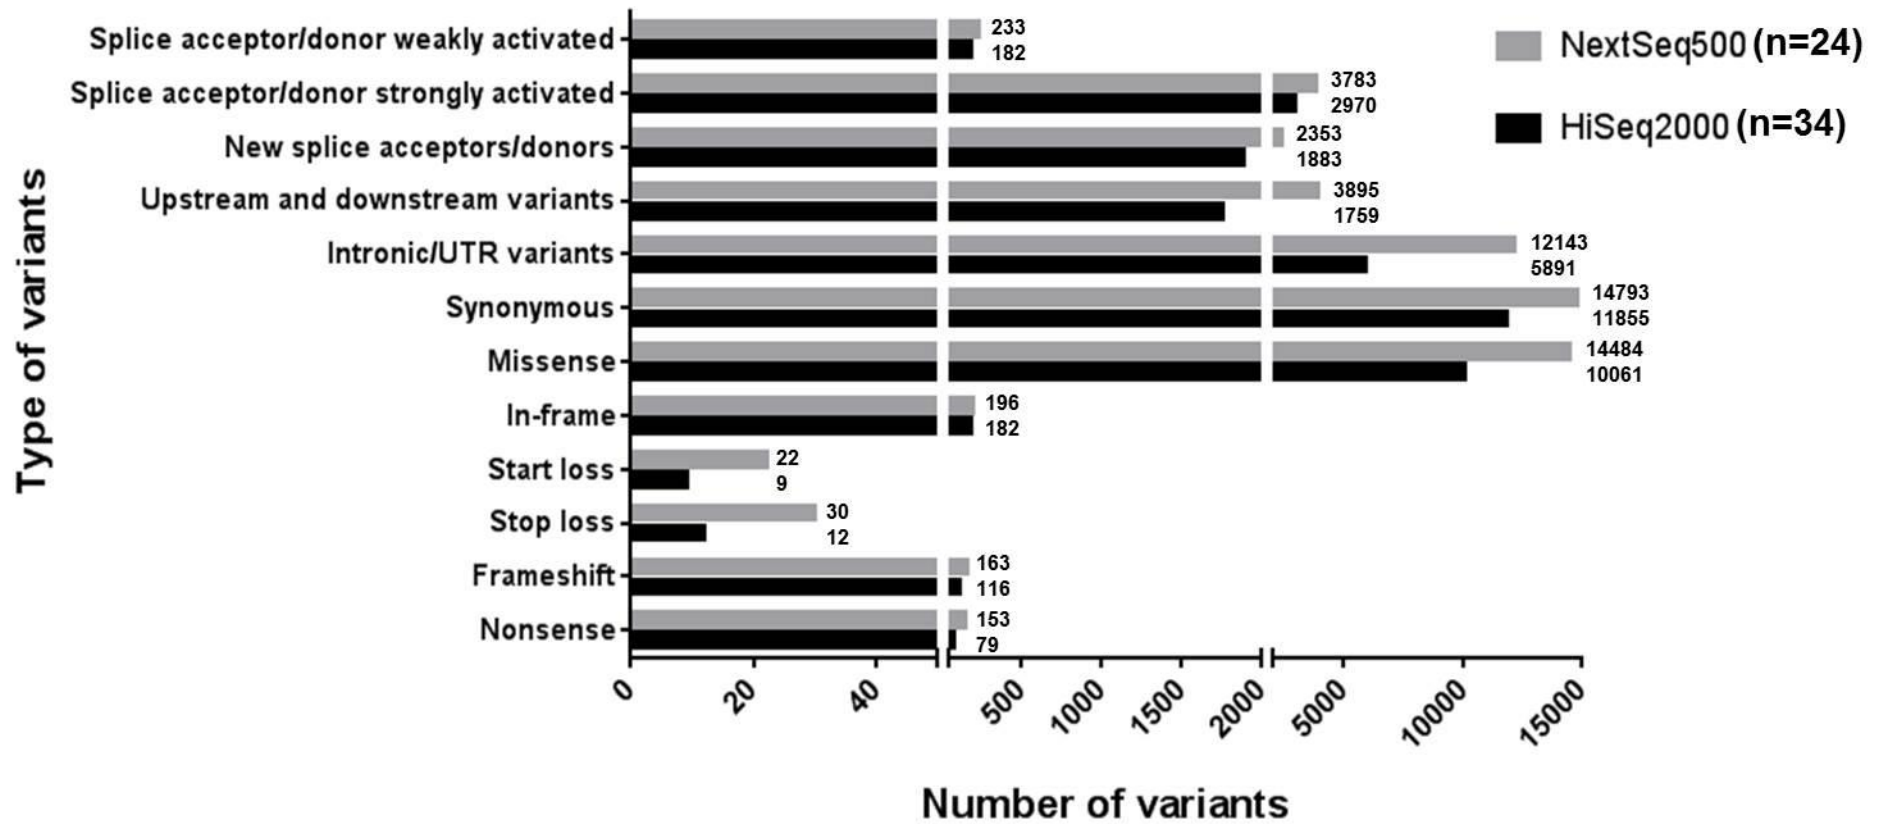

**Supplementary Table 1: Additional variants that were deemed non-causal to the phenotype in the patients. These include novel variants of uncertain significance and previously described disease-associated variants that either did not explain the clinical phenotype or the inheritance pattern.**

| S. No | Case No. | Clinical Diagnosis   | Gene            | Variant (s)                        | SIFT        | MAPP    | AGVG D Class | PolyPhen2                 | Mutation Taster2 | Predicted effect on splicing | Zygosity     | HGMD Accession |
|-------|----------|----------------------|-----------------|------------------------------------|-------------|---------|--------------|---------------------------|------------------|------------------------------|--------------|----------------|
| 1     | 71134    | Cone dystrophy       | <i>VCAN</i>     | NM_004385.4:c.1895C>T:p.Thr632Met  | Deleterious | Bad     | C15          | Benign (0.081)            | Polymorphism     |                              | Heterozygous | This study     |
|       |          |                      | <i>CDH23</i>    | NM_022124.5:c.7748C>T:p.Ala2583Val | Deleterious | Bad     | C0           | Probably damaging (0.995) | Disease-causing  |                              | Heterozygous | This study     |
|       |          |                      | <i>TLL5</i>     | NM_015072.4:c.2950A>T:p.Ser984Cys  | Deleterious | Unknown | C0           | Probably damaging (1)     | Disease-causing  |                              | Heterozygous | This study     |
|       |          |                      | <i>CACNA2D4</i> | NM_172364.4:c.1213G>A:p.Asp405Asn  | Deleterious | Bad     | C15          | Probably damaging (1)     | Disease-causing  |                              | Heterozygous | This study     |
|       |          |                      | <i>CACNA2D4</i> | NM_172364.4:c.2551+9671G>A         |             |         |              |                           |                  | New acceptor site            | Heterozygous | This study     |
| 2     | 71472    | Retinitis pigmentosa | <i>PEX7</i>     | NM_000288.3:c.377A>C:p.Gln126Pro   | Deleterious | Bad     | C15          | Probably damaging (0.822) | Disease-causing  |                              | Heterozygous | This study     |
|       |          |                      | <i>BBS1</i>     | NM_024649.4:c.1324C>T:p.Arg442Trp  | Deleterious | Good    | C0           | Probably damaging (1)     | Disease-causing  |                              | Heterozygous | This study     |
|       |          |                      | <i>RCBTB1</i>   | NM_018191.3:c.158G>A:p.Cys53Tyr    | Deleterious | Bad     | C0           | Probably damaging (1)     | Disease-causing  |                              | Heterozygous | This study     |
|       |          |                      | <i>SLC24A1</i>  | NM_004727.2:c.1976C>T:p.Ser659Leu  | Deleterious | Good    | C0           | Possibly damaging (0.626) | Disease-causing  |                              | Heterozygous | This study     |
|       |          |                      | <i>DHX38</i>    | NM_014003.3:c.901G>A:p.Glu301Lys   | Deleterious | Bad     | C55          | Benign (0.026)            | Disease-causing  |                              | Heterozygous | This study     |
| 3     | 71522    | Cone dystrophy       | <i>KIF7</i>     | NM_198525.2:c.2114A>C:p.Gln705Pro  | Deleterious | Bad     | C0           | Probably damaging (0.984) | Disease-causing  |                              | Heterozygous | This study     |

|   |       |                                            |                |                                                    |             |      |     |                           |                 |  |              |            |
|---|-------|--------------------------------------------|----------------|----------------------------------------------------|-------------|------|-----|---------------------------|-----------------|--|--------------|------------|
|   |       |                                            | <i>PITPNM3</i> | NM_031220.3:c.1656C>G:p.Ile552Met                  | Deleterious | Bad  | C1  | Probably damaging (0.973) | Disease-causing |  | Heterozygous | This study |
| 4 | 71674 | Retinal dystrophy DD: Retinitis pigmentosa | <i>VPS13B</i>  | NM_017890.4:c.8978A>G:p.Asn2993Ser                 | Deleterious | Bad  | C0  | Probably damaging (0.997) | Disease-causing |  | Heterozygous | CM041280   |
|   |       |                                            | <i>PCDH15</i>  | NM_001142763.1:c.4329_4337del:p.Pro1446_Pro1448del |             |      |     |                           |                 |  | Heterozygous | This study |
|   |       |                                            | <i>DHX38</i>   | NM_014003.3:c.3662C>T:p.Thr1221Met                 | Deleterious | Bad  | C15 | Probably damaging (1)     | Disease-causing |  | Heterozygous | This study |
|   |       |                                            | <i>USH1G</i>   | NM_173477.4:c.310A>G:p.Met104Val                   | Tolerated   |      |     | Benign (0.081)            |                 |  | Heterozygous | CM149898   |
| 5 | 71876 | Stargardt disease                          | <i>RHO</i>     | NM_000539.3:c.659T>G:p.Phe220Cys                   | Deleterious | Bad  | C65 | Probably damaging (0.991) | Disease-causing |  | Heterozygous | CM930662   |
|   |       |                                            | <i>COL9A1</i>  | NM_001851.4:c.1349A>G:p.Glu450Gly                  | Deleterious | Bad  | C66 | Probably damaging (1)     | Disease-causing |  | Heterozygous | This study |
|   |       |                                            | <i>CEP290</i>  | NM_025114.3:c.4522C>T:p.Arg1508*                   |             |      |     |                           |                 |  | Heterozygous | This study |
| 6 | 71927 | Macular dystrophy                          | <i>CNGA3</i>   | NM_001298.2:c.1618G>A:p.Val540Ile                  | Tolerated   | Good | C0  | Possibly damaging (0.465) | Disease-causing |  | Heterozygous | CM101951   |
|   |       |                                            | <i>RIMS1</i>   | NM_014989.5:c.2894C>T:p.Pro965Leu                  | Deleterious |      | C25 | Possibly damaging (0.713) | Disease-causing |  | Heterozygous | This study |
|   |       |                                            | <i>CDHR1</i>   | NM_033100.3:c.416C>G:p.Pro139Arg                   | Deleterious |      | C0  | Probably damaging (1)     | Disease-causing |  | Heterozygous | This study |
|   |       |                                            | <i>RPGRIP1</i> | NM_020366.3:c.2066T>C:p.Leu689Pro                  | Deleterious | Bad  | C0  | Probably damaging (1)     | Polymorphism    |  | Heterozygous | This study |
| 7 | 71882 | Stargardt disease                          | <i>FLVCR1</i>  | NM_014053.3:c.661C>T:p.Pro221Ser                   | Deleterious |      | C65 | Probably damaging (0.999) | Disease-causing |  | Heterozygous | This study |

|    |       |                      |                 |                                     |             |      |     |                           |                 |                      |              |            |
|----|-------|----------------------|-----------------|-------------------------------------|-------------|------|-----|---------------------------|-----------------|----------------------|--------------|------------|
|    |       |                      | <i>MERTK</i>    | NM_006343.2:c.791 C>G:p.Ala264Gly   | Deleterious | Bad  | C65 | Probably damaging (1)     | Disease-causing |                      | Heterozygous | CM1312856  |
|    |       |                      | <i>DNAH5</i>    | NM_001369.2:c.12709G>T:p.Val4237Phe | Deleterious | Bad  | C0  | Benign (0.193)            | Disease-causing |                      | Heterozygous | This study |
|    |       |                      | <i>ADGRV1</i>   | NM_032119.3:c.2261T>C:p.Val754Ala   | Deleterious | Bad  | C25 | Possibly damaging (0.682) | Disease-causing |                      | Heterozygous | This study |
| 8  | 70052 | Retinitis pigmentosa | <i>TMEM237</i>  | NM_001044385.2:c.43-1G>C            |             |      |     |                           |                 | Splice acceptor lost | Heterozygous | This study |
|    |       |                      | <i>NBAS</i>     | NM_015909.3:c.2116C>T:p.His706Tyr   | Deleterious |      | C65 | Possibly damaging (0.828) | Disease-causing |                      | Heterozygous | This study |
| 9  | 71688 | Retinitis pigmentosa | <i>RPGRIP1</i>  | NM_020366.3:c.3358A>G:p.Ile1120Val  | Tolerated   | Good | C0  | Possibly damaging (0.838) | Polymorphism    |                      | Heterozygous | CM076486   |
| 10 | 29870 | Retinitis pigmentosa | <i>BBS9</i>     | NM_198428.2:c.2363C>T:p.Ser788Phe   | Deleterious | Bad  | C15 | Probably damaging (0.997) | Disease-causing |                      | Heterozygous | This study |
|    |       |                      | <i>CHM</i>      | NM_000390.2:c.223T>C:p.Trp75Arg     | Deleterious | Bad  | C0  | Probably damaging (0.994) | Disease-causing |                      | Heterozygous | This study |
| 11 | 71703 | Cone-rod dystrophy   | <i>C2orf71</i>  | NM_014704.3:c.1966C>T:p.Arg656Cys   | Deleterious | Bad  | C0  | Probably damaging (1)     | Disease-causing |                      | Heterozygous | This study |
|    |       |                      | <i>COL11A2</i>  | NM_080680.2:c.388C>T:p.Arg130Trp    | Deleterious | Bad  | C0  | Probably damaging (1)     | Disease-causing |                      | Heterozygous | This study |
|    |       |                      | <i>PEX1</i>     | NM_000466.2:c.3208-1G>A             |             |      |     |                           |                 | Splice acceptor lost | Heterozygous | This study |
|    |       |                      | <i>FZD4</i>     | NM_012193.3:c.356G>T:p.Gly119Val    | Deleterious | Bad  | C15 | Benign (0.014)            | Disease-causing |                      | Heterozygous | This study |
|    |       |                      | <i>RPGRIP1L</i> | NM_015272.3:c.1340T>C:p.Leu447Ser   | Tolerated   |      | C25 | Benign (0.01)             |                 |                      | Heterozygous | CM093292   |
|    |       |                      | <i>AIP1</i>     | NM_014336.4:c.244C>T:p.His82Tyr     | Tolerated   |      | C0  | Possibly damaging         | Polymorphism    |                      | Heterozygous | CM034202   |

|    |       |                      |                |                                      |             |     |     |                           |                 |                                  |              |            |
|----|-------|----------------------|----------------|--------------------------------------|-------------|-----|-----|---------------------------|-----------------|----------------------------------|--------------|------------|
|    |       |                      |                |                                      |             |     |     | (0.666)                   |                 |                                  |              |            |
| 12 | 71918 | Retinitis pigmentosa | <i>PDE6B</i>   | NM_000283.3:c.794 G>A:p.Arg265Gln    | Deleterious | Bad | C0  | Probably damaging (1)     | Disease-causing | New acceptor site                | Heterozygous | This study |
|    |       |                      | <i>PROM1</i>   | NM_006017.2:c.114 2-1G>A             |             |     |     |                           |                 | New acceptor site                | Heterozygous | CS107464   |
|    |       |                      | <i>VCAN</i>    | NM_004385.4:c.223 4A>C:p.Lys745Thr   | Deleterious | Bad | C0  | Probably damaging (0.958) | Polymorphism    |                                  | Heterozygous | This study |
|    |       |                      | <i>ITGB3</i>   | NM_000212.2:c.157 6G>C:p.Glu526Gln   | Deleterious | Bad | C0  | Probably damaging (0.981) | Disease-causing |                                  | Heterozygous | This study |
|    |       |                      | <i>CACNA1F</i> | NM_005183.3:c.411 8T>C:p.Val1373Ala  | Deleterious |     | C25 | Probably damaging (0.948) | Disease-causing |                                  | Heterozygous | This study |
| 13 | 71471 | Retinitis pigmentosa | <i>ABCA4</i>   | NM_000350.2:c.311 3C>T:p.Ala1038Val  | Deleterious | Bad | C65 | Benign (0.009)            | Disease-causing |                                  | Heterozygous | CM970006   |
|    |       |                      | <i>CRB1</i>    | NM_201253.2:c.284 2T>C:p.Cys948Arg   | Deleterious | Bad | C66 | Probably damaging (0.998) | Disease-causing | Cryptic Donor Strongly Activated | Heterozygous | This study |
|    |       |                      | <i>GRM6</i>    | NM_000843.3:c.116 2C>T:p.Arg388Cys   | Deleterious | Bad | C0  | Probably damaging (1)     | Disease-causing |                                  | Heterozygous | This study |
| 14 | 71728 | Retinitis pigmentosa | <i>ADGRV1</i>  | NM_032119.3:c.170 17A>G:p.Lys5673Glu | Deleterious | Bad | C0  | Possibly damaging (0.748) | Disease-causing |                                  | Heterozygous | This study |
| 15 | 28865 | Retinitis pigmentosa | <i>IMPG2</i>   | NM_016247.3:c.303 8C>T:p.Pro1013Leu  | Deleterious | Bad | C65 | Probably damaging (0.976) | Disease-causing |                                  | Heterozygous | This study |
|    |       |                      | <i>TRIM32</i>  | NM_001099679.1:c.314G>T:p.Arg105Leu  | Deleterious | Bad | C15 | Possibly damaging (0.701) | Disease-causing |                                  | Heterozygous | This study |
| 16 | 24058 | Retinitis pigmentosa | <i>PDE6B</i>   | NM_000283.3:c.105 9+51G>A            |             |     |     |                           |                 | New acceptor site                | Homozygous   | This study |
|    |       |                      | <i>BBS7</i>    | NM_176824.2:c.36+ 20C>T              |             |     |     |                           |                 | New donor site                   | Heterozygous | This study |

|    |       |                      |               |                                     |             |      |     |                           |                 |                                  |              |            |
|----|-------|----------------------|---------------|-------------------------------------|-------------|------|-----|---------------------------|-----------------|----------------------------------|--------------|------------|
|    |       |                      | <i>DHX38</i>  | NM_014003.3:c.901 G>A:p.Glu301Lys   | Deleterious | Bad  | C55 | Benign (0.026)            | Disease-causing |                                  | Heterozygous | This study |
| 17 | 71192 | Retinal dystrophy    | <i>HMCN1</i>  | NM_031935.2:c.8815G>A:p.Gly2939Ser  | Deleterious | Good | C55 | Probably damaging (0.987) | Disease-causing |                                  | Heterozygous | This study |
| 18 | 71762 | Retinitis pigmentosa | <i>IMPG2</i>  | NM_016247.3:c.283 G>A:p.Glu95Lys    | Deleterious | Bad  | C15 | Probably damaging (0.986) | Disease-causing |                                  | Heterozygous | This study |
|    |       |                      | <i>ADGRV1</i> | NM_032119.3:c.2834G>A:p.Gly945Glu   | Deleterious | Bad  | C0  | Probably damaging (0.998) | Disease-causing |                                  | Heterozygous | This study |
|    |       |                      | <i>BBS9</i>   | NM_198428.2:c.1967G>A:p.Arg656Gln   | Deleterious | Bad  | C0  | Probably damaging (1)     | Disease-causing |                                  | Heterozygous | This study |
|    |       |                      | <i>TRIM32</i> | NM_001099679.1:c.558G>C:p.Gln186His | Deleterious | Bad  | C15 | Probably damaging (0.948) | Disease-causing |                                  | Heterozygous | This study |
|    |       |                      | <i>ZNF408</i> | NM_024741.2:c.1342C>T:p.Arg448Cys   | Deleterious | Bad  | C65 | Probably damaging (0.993) | Disease-causing |                                  | Heterozygous | This study |
|    |       |                      | <i>GNPTG</i>  | NM_032520.4:c.502 G>A:p.Val168Ile   | Deleterious | Bad  | C25 | Probably damaging (0.999) | Disease-causing |                                  | Heterozygous | This study |
|    |       |                      | <i>PDE6G</i>  | NM_002602.3:c.136 G>C:p.Gly46Arg    | Deleterious | Bad  | C65 | Probably damaging (1)     | Disease-causing |                                  | Heterozygous | This study |
| 19 | 72007 | Retinitis pigmentosa | <i>CNGA3</i>  | NM_001298.2:c.847 C>T:p.Arg283Trp   | Deleterious | Bad  | C65 | Probably damaging (1)     | Disease-causing |                                  | Heterozygous | CM980376   |
|    |       |                      | <i>ARL6</i>   | NM_001278293.1:c.349+36G>A          |             |      |     |                           |                 | New acceptor site                | Heterozygous | This study |
|    |       |                      | <i>NPHP3</i>  | NM_153240.4:c.1189C>T:p.Arg397Cys   | Tolerated   | Bad  | C0  | Probably damaging (0.992) | Disease-causing |                                  | Heterozygous | CM077306   |
|    |       |                      | <i>RP1</i>    | NM_006269.1:c.615+3G>A              |             |      |     |                           |                 | Cryptic Donor Strongly Activated | Heterozygous | This study |

|    |       |                            |               |                                         |             |      |     |                           |                 |                |              |            |
|----|-------|----------------------------|---------------|-----------------------------------------|-------------|------|-----|---------------------------|-----------------|----------------|--------------|------------|
|    |       |                            | <i>PHYH</i>   | NM_006214.3:c.734G>A:p.Arg245Gln        | Deleterious | Bad  | C0  | Probably damaging (0.948) | Disease-causing |                | Heterozygous | CM001299   |
|    |       |                            | <i>BBS10</i>  | NM_024685.3:c.1631A>G:p.Asn544Ser       | Tolerated   | good | C0  | Benign (0)                | Polymorphism    |                | Heterozygous | CM1010462  |
|    |       |                            | <i>MKKS</i>   | NM_018848.3:c.1553G>A:p.Arg518His       | Tolerated   | good | C1  | Benign (0)                | Polymorphism    |                | Heterozygous | CM010926   |
| 20 | 13730 | Retinitis pigmentosa       | <i>ABCA4</i>  | NM_000350.2:c.1302del:p.Gln437Argfs*12  |             |      |     |                           |                 |                | Heterozygous | CD156176   |
|    |       |                            | <i>NBAS</i>   | NM_015909.3:c.6466dup:p.Arg2156Profs*12 |             |      |     |                           |                 |                | Heterozygous | This study |
|    |       |                            | <i>CNGB1</i>  | NM_001297.4:c.2747G>A:p.Arg916His       | Deleterious | Bad  | C25 | Probably damaging (1)     | Disease-causing |                | Heterozygous | CM119879   |
| 21 | 30421 | Leber Congenital Amaurosis | <i>ABCA4</i>  | NM_000350.2:c.688T>A:p.Cys230Ser        | Deleterious | Bad  | C65 | Probably damaging (0.992) | Disease-causing |                | Heterozygous | CM003361   |
|    |       |                            | <i>HMCN1</i>  | NM_031935.2:c.1535C>T:p.Thr512Ile       | Deleterious | Bad  | C0  | Probably damaging (0.995) | Disease-causing |                | Heterozygous | This study |
|    |       |                            | <i>CRB1</i>   | NM_201253.2:c.4039del:p.Thr1347Leufs*5  |             |      |     |                           |                 |                | Heterozygous | This study |
|    |       |                            | <i>NBAS</i>   | NM_015909.3:c.5465A>C:p.Asn1822Thr      | Deleterious |      | C55 | Probably damaging (1)     | Disease-causing |                | Heterozygous | This study |
| 22 | 71315 | Retinitis pigmentosa       | <i>IMPG2</i>  | NM_016247.3:c.1300C>T:p.Pro434Ser       | Deleterious | Bad  | C0  | Probably damaging (0.993) | Disease-causing |                | Heterozygous | This study |
|    |       |                            | <i>BBS12</i>  | NM_152618.2:c.116T>C:p.Ile39Thr         | Deleterious | Bad  | C1  | Probably damaging (0.988) | Disease-causing |                | Heterozygous | CM1010465  |
|    |       |                            | <i>COL9A1</i> | NM_001851.4:c.2159G>A:p.Arg720Gln       | Deleterious | Bad  | C35 | Probably damaging (1)     | Disease-causing |                | Heterozygous | This study |
|    |       |                            | <i>CDH23</i>  | NM_022124.5:c.2714C>T:p.Ala905Val       | Deleterious | Bad  | C65 | Benign (0.112)            | Disease-causing | New donor site | Heterozygous | This study |



|    |       |                            |                |                                          |             |            |     |                           |                 |                                  |              |            |
|----|-------|----------------------------|----------------|------------------------------------------|-------------|------------|-----|---------------------------|-----------------|----------------------------------|--------------|------------|
|    |       |                            | <i>RPGRIP1</i> | NM_020366.3:c.1767G>T:p.Gln589His        | Deleterious | Bad        | C0  | Probably damaging (0.995) | Disease-causing |                                  | Heterozygous | CM057749   |
| 23 | 29303 | Retinitis pigmentosa       | <i>DTHD1</i>   | NM_001170700.2:c.1442T>C:p.Leu481Pro     | Deleterious |            | C25 | Probably damaging (0.994) | Disease-causing |                                  | Heterozygous | This study |
|    |       |                            | <i>CDH23</i>   | NM_022124.5:c.1307G>A:p.Ser436Asn        | Deleterious | Bad        | C45 | Probably damaging (0.991) | Disease-causing |                                  | Heterozygous | This study |
|    |       |                            | <i>ROM1</i>    | NM_000327.3:c.686G>A:p.Arg229His         | Tolerated   | Good       | C0  | Benign (0.048)            | Polymorphism    |                                  | Heterozygous | CM104430   |
|    |       |                            | <i>BBS1</i>    | NM_024649.4:c.24T>C:p.Asp8Asp            |             |            |     |                           |                 |                                  | Heterozygous | CM085270   |
| 24 | 71133 | Leber Congenital Amaurosis | <i>IFT172</i>  | NM_015662.2:c.4611C>G:p.Ile1537Met       | Deleterious | Not scored | C0  | Probably damaging (0.96)  | Not scored      |                                  | Homozygous   | This study |
|    |       |                            | <i>ALMS1</i>   | ENST00000264448.6:c.8237T>G:p.Val2746Gly | Deleterious |            | C0  | Probably damaging (0.899) | Disease-causing |                                  | Heterozygous | This study |
|    |       |                            | <i>CNGB3</i>   | NM_019098.4:c.2420C>G:p.Ala807Gly        | Tolerated   | Good       | C0  | Benign (0.437)            | Polymorphism    | New donor site                   | Heterozygous | This study |
|    |       |                            | <i>PHYH</i>    | NM_006214.3:c.734G>A:p.Arg245Gln         | Deleterious | Bad        | C0  | Probably damaging (0.948) | Disease-causing |                                  | Heterozygous | CM001299   |
|    |       |                            | <i>BEST1</i>   | NM_001139443.1:c.857C>A:p.Pro286His      | Deleterious | Bad        | C0  | Probably damaging (1)     | Disease-causing |                                  | Heterozygous | CM1511254  |
|    |       |                            | <i>FZD4</i>    | NM_012193.3:c.118G>C:p.Glu40Gln          | Deleterious | Bad        | C25 | Benign (0.389)            | Disease-causing |                                  | Heterozygous | CM103438   |
| 25 | 71161 | Leber Congenital Amaurosis | <i>USH2A</i>   | NM_206933.2:c.15433G>A:p.Val5145Ile      | Deleterious | Bad        | C0  | Possibly damaging (0.553) | Disease-causing |                                  | Heterozygous | CM140609   |
|    |       |                            | <i>VPS13B</i>  | NM_017890.4:c.4157+5A>G                  |             |            |     |                           |                 | Cryptic Donor Strongly Activated | Heterozygous | This study |
|    |       |                            | <i>RPGRIP1</i> | NM_020366.3:c.2017C>T:p.Gln673*          |             |            |     |                           |                 |                                  | Heterozygous | This study |
|    |       |                            | <i>BBS10</i>   | NM_024685.3:c.163                        | Tolerated   | Good       | C0  | Benign (0)                | Polymorp        |                                  | Heterozygous | CM101046   |

|    |       |                        |               |                                    |             |         |     |                           |                 |                                     |              |            |
|----|-------|------------------------|---------------|------------------------------------|-------------|---------|-----|---------------------------|-----------------|-------------------------------------|--------------|------------|
|    |       |                        |               | 1A>G:p.Asn544Ser                   |             |         |     |                           | hism            |                                     | us           | 2          |
|    |       |                        | <i>MKS1</i>   | NM_017777.3:c.857A>G:p.Asp286Gly   | Deleterious | Bad     | C0  | Possibly damaging (0.949) | Disease-causing |                                     | Heterozygous | CM081333   |
| 26 | 70946 | Best macular dystrophy | <i>USH2A</i>  | NM_206933.2:c.6240G>T:p.Lys2080Asn | Tolerated   | Good    | C0  | Possibly damaging (0.883) | Polymorphism    |                                     | Heterozygous | CM155319   |
|    |       |                        | <i>GRM6</i>   | NM_000843.3:c.1292C>T:p.Pro431Leu  | Tolerated   | Bad     | C0  | Probably damaging (0.982) | Disease-causing |                                     | Heterozygous | This study |
|    |       |                        | <i>INPP5E</i> | NM_019892.4:c.746C>T:p.Ser249Phe   | Deleterious |         | C0  | Probably damaging (0.999) | Disease-causing |                                     | Heterozygous | This study |
| 27 | 70559 | Best macular dystrophy | <i>CCDC40</i> | NM_017950.2:c.2251C>A:p.Pro751Thr  | Deleterious | Bad     | C0  | Probably damaging (0.998) | Disease-causing |                                     | Heterozygous | This study |
|    |       |                        | <i>CEP164</i> | NM_014956.4:c.190C>G:p.Pro64Ala    | Deleterious | Bad     | C25 | Possibly damaging (0.471) | Disease-causing |                                     | Heterozygous | This study |
|    |       |                        | <i>GRM6</i>   | NM_000843.3:c.1732C>T:p.Arg578Cys  | Deleterious | Bad     | C15 | Possibly damaging (0.629) | Disease-causing |                                     | Heterozygous | This study |
|    |       |                        | <i>IMPG2</i>  | NM_016247.3:c.263G>T:p.Gly88Val    | Deleterious | Bad     | C65 | Probably damaging (1)     | Disease-causing | Cryptic Acceptor Strongly Activated | Heterozygous | This study |
|    |       |                        | <i>MKKS</i>   | NM_170784.1:c.1015A>G:p.Ile339Val  | Tolerated   | Good    | C0  | Benign (0.008)            | Polymorphism    | New donor site                      | Heterozygous | CM021299   |
|    |       |                        | <i>VPS13B</i> | NM_017890.4:c.3386A>G:p.Lys1129Arg | Tolerated   | Good    | C0  | Benign (0.125)            | Disease-causing | New donor site                      | Heterozygous | This study |
|    |       |                        | <i>PCDH15</i> | NM_001142763.1:c.*14916G>A         |             |         |     |                           |                 | New acceptor site                   | Heterozygous | This study |
|    |       |                        | <i>KIF7</i>   | NM_198525.2:c.1015A>C:p.Thr339Pro  | Deleterious | Unknown | C0  | Probably damaging (0.977) | Disease-causing |                                     | Heterozygous | This study |
|    |       |                        | <i>ITGB3</i>  | NM_000212.2:c.785T>C:p.Ile262Thr   | Deleterious | Bad     | C65 | Probably damaging (0.998) | Disease-causing |                                     | Heterozygous | This study |

|    |       |                       |                 |                                     |             |         |     |                           |                 |                 |              |            |
|----|-------|-----------------------|-----------------|-------------------------------------|-------------|---------|-----|---------------------------|-----------------|-----------------|--------------|------------|
| 28 | 71583 | Retinal dystrophy     | <i>LRP5</i>     | NM_002335.2:c.2489C>T:p.Ser830Leu   | Deleterious | Bad     | C65 | Probably damaging (1)     | Disease-causing |                 | Heterozygous | This study |
|    |       |                       | <i>PCYT1A</i>   | NM_001312673.1:c.217+5G>A           |             |         |     |                           |                 |                 | Heterozygous | This study |
| 29 | 71749 | Retinitis pigmentosa  | <i>CDHR1</i>    | NM_033100.3:c.783G>A:p.Pro261Pro    |             |         |     |                           |                 |                 | Heterozygous | CS140565   |
|    |       |                       | <i>EMC1</i>     | NM_015047.2:c.2641C>T:p.Arg881Cys   | Deleterious | Bad     | C25 | Probably damaging (1)     | Disease-causing |                 | Heterozygous | This study |
|    |       |                       | <i>LCA5</i>     | NM_001122769.2:c.661T>G:p.Leu221Val | Deleterious | Bad     | C0  | Probably damaging (1)     | Disease-causing |                 | Heterozygous | This study |
| 30 | 30806 | Bardet-Biedl Syndrome | <i>CDH23</i>    | NM_022124.5:c.3845A>G:p.Asn1282Ser  | Deleterious | Bad     | C45 | Possibly damaging (0.933) | Disease-causing |                 | Heterozygous | This study |
|    |       |                       | <i>DHX29</i>    | NM_019030.2:c.3670C>A:p.Leu1224Met  | Deleterious | Bad     | C0  | Probably damaging (0.998) | Disease-causing |                 | Heterozygous | This study |
|    |       |                       | <i>KIAA0556</i> | NM_015202.2:c.27dup:p.Glu10Argfs*16 |             |         |     |                           |                 |                 | Heterozygous | This study |
| 31 | 27419 | Usher syndrome        | <i>DNAH5</i>    | NM_001369.2:c.8757G>C:p.Glu2919Asp  | Deleterious | Bad     | C0  | Benign (0.190)            | Disease-causing |                 | Heterozygous | This study |
|    |       |                       | <i>PARVA</i>    | NM_018222.4:c.425T>C:p.Ile142Thr    | Deleterious | Bad     | C0  | Possibly damaging (0.739) | Disease-causing |                 | Heterozygous | This study |
|    |       |                       | <i>PDE6A</i>    | NM_000440.2:c.1926+1G>A:p.?         |             |         |     |                           |                 | Donor site lost | Heterozygous | This study |
|    |       |                       | <i>ROM1</i>     | NM_000327.3:c.47G>A:p.Arg16His      | Deleterious | Bad     | C0  | Possibly damaging (0.82)  | Polymorphism    |                 | Heterozygous | This study |
|    |       |                       | <i>TRPM1</i>    | NM_001252020.1:c.511G>A:p.Gly171Arg | Deleterious | Bad     | C65 | Probably damaging (1)     | Disease-causing |                 | Heterozygous | This study |
| 32 | 25939 | Retinitis pigmentosa  | <i>ABCA4</i>    | NM_000350.2:c.466A>G:p.Ile156Val    | Tolerated   | Good    | C0  | Benign (0.002)            | Disease-causing |                 | Heterozygous | CM003569   |
|    |       |                       | <i>CDHR1</i>    | NM_033100.3:c.1367C>A:p.Ala456Glu   | Deleterious | Unknown | C0  | Probably damaging (1)     | Disease-causing |                 | Heterozygous | This study |

|    |       |                                            |                |                                     |             |         |     |                           |                 |                                     |              |            |
|----|-------|--------------------------------------------|----------------|-------------------------------------|-------------|---------|-----|---------------------------|-----------------|-------------------------------------|--------------|------------|
|    |       |                                            | <i>DHX38</i>   | NM_014003.3:c.2838G>T:p.Met946Ile   | Deleterious | Bad     | C0  | Probably damaging (0.995) | Disease-causing |                                     | Heterozygous | This study |
|    |       |                                            | <i>FAM161A</i> | NM_001201543.1:c.881C>T:p.Pro294Leu | Deleterious | Bad     | C65 | Probably damaging (1)     | Disease-causing |                                     | Heterozygous | This study |
|    |       |                                            | <i>MKKS</i>    | NM_018848.3:c.1015A>G:p.Ile339Val   | Tolerated   | Good    | C0  | Benign (0.008)            | Polymorphism    | New donor site                      | Heterozygous | CM021299   |
|    |       |                                            | <i>NPHP4</i>   | NM_015102.4:c.3364A>C:p.Thr1122Pro  | Tolerated   | Unknown | C0  | Probably damaging (0.967) | Unknown         |                                     | Heterozygous | CM110621   |
|    |       |                                            | <i>USH2A</i>   | NM_206933.2:c.12343C>T:p.Arg4115Cys | Deleterious | Bad     | C65 | Benign (0.167)            | Disease-causing |                                     | Heterozygous | CM045641   |
| 33 | 71868 | Retinitis pigmentosa DD: Retinal dystrophy | <i>IMPG2</i>   | NM_016247.3:c.926A>G:p.Tyr309Cys    | Deleterious | Bad     | C55 | Probably damaging (1)     | Disease-causing |                                     | Heterozygous | This study |
| 34 | 71808 | Retinitis pigmentosa                       | <i>COL11A1</i> | NM_080629.2:c.4452C>A:p.Asp1484Glu  | Deleterious | Bad     | C35 | Probably damaging (0.996) | Disease-causing |                                     | Heterozygous | This study |
|    |       |                                            | <i>COL9A1</i>  | NM_001851.4:c.1349A>G:p.Glu450Gly   | Deleterious | Bad     | C65 | Probably damaging (1)     | Disease-causing |                                     | Heterozygous | This study |
|    |       |                                            | <i>IFT172</i>  | NM_015662.2:c.4793A>G:p.Asn1598Ser  | Deleterious | Unknown | C0  | Probably damaging (1)     | Unknown         | New acceptor site                   | Heterozygous | This study |
|    |       |                                            | <i>MKS1</i>    | NM_017777.3:c.1388G>A:p.Arg463Gln   | Tolerated   | Good    | C0  | Benign (0.175)            | Disease-causing | New acceptor site                   | Heterozygous | This study |
|    |       |                                            | <i>RGR</i>     | NM_002921.3:c.505G>T:p.Asp169Tyr    | Deleterious | Bad     | C65 | Probably damaging (1)     | Disease-causing | Cryptic acceptor strongly activated | Heterozygous | This study |
|    |       |                                            | <i>USH2A</i>   | NM_206933.2:c.10931C>T:p.Thr3644Met | Deleterious | Bad     | C65 | Probably damaging (0.966) | Disease-causing |                                     | Heterozygous | CM149213   |
| 35 | 71094 | Cone-rod dystrophy                         | <i>CRB1</i>    | NM_201253.2:c.135C>G:p.Cys45Trp     | Deleterious | Bad     | C65 | Probably damaging         | Disease-causing |                                     | Heterozygous | CM107848   |

|    |       |                   |              |                                    |             |      |     |                           |                 |  |              |            |
|----|-------|-------------------|--------------|------------------------------------|-------------|------|-----|---------------------------|-----------------|--|--------------|------------|
|    |       |                   |              |                                    |             |      |     | (1)                       |                 |  |              |            |
|    |       |                   | <i>LGR4</i>  | NM_018490.2:c.2359C>G:p.Leu787Val  | Deleterious | Bad  | C25 | Probably damaging (0.999) | Disease-causing |  | Heterozygous | This study |
|    |       |                   | <i>MKKS</i>  | NM_018848.3:c.724G>T:p.Ala242Ser   | Deleterious | Good | C15 | Probably damaging (0.987) | Disease-causing |  | Heterozygous | CM001242   |
|    |       |                   | <i>USH2A</i> | NM_206933.2:c.6632G>T:p.Gly2211Val | Deleterious | Bad  | C65 | Probably damaging (1)     | Disease-causing |  | Heterozygous | This study |
| 36 | 71718 | Stargardt disease | <i>ABCA4</i> | NM_000350.2:c.5882G>A:p.Gly1961Glu | Deleterious | Bad  | C65 | Probably damaging (1)     | Disease-causing |  | Heterozygous | CM970016   |
|    |       |                   | <i>PDE6B</i> | NM_000283.3:c.655T>C:p.Tyr219His   | Tolerated   | Good | C0  | Benign (0.025)            | Polymorphism    |  | Heterozygous | CM942034   |
| 37 | 71780 | Macular dystrophy | <i>CNNM4</i> | NM_020184.3:c.973G>A:p.Asp325Asn   | Deleterious | Bad  | C15 | Probably damaging (0.999) | Disease-causing |  | Heterozygous | This study |
|    |       |                   | <i>DHX38</i> | NM_014003.3:c.1379G>A:p.Arg460His  | Deleterious | Bad  | C25 | Probably damaging (1)     | Disease-causing |  | Heterozygous | This study |
|    |       |                   | <i>DHX38</i> | NM_014003.3:c.3098T>C:p.Ile1033Thr | Deleterious | Bad  | C65 | Probably damaging (0.993) | Disease-causing |  | Heterozygous | This study |
|    |       |                   | <i>RAX2</i>  | NM_032753.3:c.92G>A:p.Arg31His     | Deleterious | Bad  | C25 | Probably damaging (1)     | Unknown         |  | Heterozygous | This study |
|    |       |                   | <i>RP1L1</i> | NM_178857.5:c.1138G>A:p.Gly380Arg  | Deleterious | Bad  | C65 | Probably damaging (0.959) | Disease-causing |  | Heterozygous | This study |
